# Supplementary material for: Ipsilateral Radial Neuropathy after COVID-19 mRNA Vaccination in an Immunocompetent Young Man
Source: PubMed Central journal article supplement — Yonsei Med J. 2022 Sep 6;63(10):966–70. doi: 10.3349/ymj.2022.0038 (PMC9520044; doi:10.3349/ymj.2022.0038), 2022-09-06
Supplement: ymj-63-966-s001.pdf [file ymj-63-966-s001.pdf]

**Supplementary Table 1.** Serial Nerve Conduction Studies of the Patient

| Nerves                                                                       | Terminal latency (ms)<br>(normal limit) | CMAP amplitude (mV)<br>(normal limit) | Conduction velocity           |                                 | SNAP amplitude (uV)<br>(normal limit) |
|------------------------------------------------------------------------------|-----------------------------------------|---------------------------------------|-------------------------------|---------------------------------|---------------------------------------|
|                                                                              |                                         |                                       | Motor (m/s)<br>(normal limit) | Sensory (m/s)<br>(normal limit) |                                       |
| On the 3rd day following the first symptom (3 days from vaccine injection)   |                                         |                                       |                               |                                 |                                       |
| Median Rt./Lt.                                                               |                                         |                                       |                               |                                 |                                       |
| Palm                                                                         |                                         |                                       |                               | 46/45 (>30)                     | 54.4/30.8                             |
| Wrist                                                                        | 2.7/2.6 (<3.9)                          | 13.7/8.3 (>6.0)                       | 61/61 (>50.5)                 | 54/54 (>39.3)                   | 29.2/41.0 (>8.8)                      |
| Elbow                                                                        | 7.1/7.0                                 | 12.5/8.0 (>6.0)                       | 55/55 (>51.2)                 | 59/56 (>50.5)                   | 49.3/49.5 (>15.0)                     |
| Axilla                                                                       | 8.9/8.8                                 | 10.6/8.2 (>6.0)                       |                               |                                 |                                       |
| Ulnar Rt./Lt.                                                                |                                         |                                       |                               |                                 |                                       |
| Wrist                                                                        | 2.4/2.3 (<3.0)                          | 9.0/8.5 (>6.0)                        | 57/60 (>51.7)                 | 47/51 (>37.5)                   | 31.6/22.5 (>15.0)                     |
| B elbow                                                                      | 7.0/6.6                                 | 8.8/7.2 (>6.0)                        | 77/53 (>42.5)                 |                                 |                                       |
| A elbow                                                                      | 7.9/8.1                                 | 8.9/6.7 (>6.0)                        | 54/50 (>46.7)                 | 57/55 (>48.5)                   | 13.7/22.5                             |
| Axilla                                                                       | 9.0/9.2                                 | 8.4/6.6 (>6.0)                        |                               | 55/50 (>44.1)                   | 14.3/21.0                             |
| Radial Rt./Lt.                                                               |                                         |                                       |                               |                                 |                                       |
| Wrist                                                                        |                                         |                                       |                               | 52/52 (>38.5)                   | 38.7/22.3                             |
| Forearm                                                                      | 4.3/4.3                                 | 5.3/3.6                               | 95/87                         |                                 |                                       |
| Spiral G                                                                     | 5.5/5.5                                 | 5.3/3.6                               |                               |                                 |                                       |
| On the 17th day following the first symptom (17 days from vaccine injection) |                                         |                                       |                               |                                 |                                       |
| Median Rt./Lt.                                                               |                                         |                                       |                               |                                 |                                       |
| Palm                                                                         |                                         |                                       |                               | 50/42 (>30)                     | 28.1/29.1                             |
| Wrist                                                                        | 2.9/2.7 (<3.9)                          | 11.7/10.8 (>6.0)                      | 61/57 (>50.5)                 | 54/54 (>39.3)                   | 40.5/37.7 (>8.8)                      |
| Elbow                                                                        | 7.4/7.2                                 | 11.1/10.2 (>6.0)                      | 62/67 (>51.2)                 | 58/57 (>50.5)                   | 52.8/33.0 (>15.0)                     |
| Axilla                                                                       | 9.4/9.0                                 | 11.1/10.8 (>6.0)                      |                               |                                 |                                       |
| Ulnar Rt./Lt.                                                                |                                         |                                       |                               |                                 |                                       |
| Wrist                                                                        | 2.1/2.4 (<3.0)                          | 10.3/9.3 (>6.0)                       | 62/58 (>51.7)                 | 52/50 (>37.5)                   | 24.7/29.9 (>15.0)                     |
| B elbow                                                                      | 6.6/6.8                                 | 9.3/8.1 (>6.0)                        | 63/57 (>42.5)                 |                                 |                                       |
| A elbow                                                                      | 7.7/8.2                                 | 8.9/8.1 (>6.0)                        | 61/53 (>46.7)                 | 54/54 (>48.5)                   | 27.7/16.4                             |
| Axilla                                                                       | 9.0/9.5                                 | 9.5/8.0 (>6.0)                        |                               | 57/54 (>44.1)                   | 13.1/43.6                             |
| Radial Rt./Lt.                                                               |                                         |                                       |                               |                                 |                                       |
| Wrist                                                                        |                                         |                                       |                               | 47/48 (>38.5)                   | 26.6/24.6                             |
| Forearm                                                                      | 4.2/3.8                                 | 6.1/3.6                               | 92/92                         |                                 |                                       |
| Spiral G                                                                     | 5.5/5.2                                 | 7.0/3.4                               |                               |                                 |                                       |
| Lateral ante-brachial Rt./Lt.                                                |                                         |                                       |                               | 50.0/47.8                       | 22.6/20.8                             |
| Medial ante-brachial Rt./Lt.                                                 |                                         |                                       |                               | 50.0/52.6                       | 8.8/15.2                              |
| On the 28th day following the first symptom (30 days from vaccine injection) |                                         |                                       |                               |                                 |                                       |
| Median Rt./Lt.                                                               |                                         |                                       |                               |                                 |                                       |
| Palm                                                                         |                                         |                                       |                               | 48/50 (>30)                     | 34.6/55.9                             |
| Wrist                                                                        | 2.8/2.6 (<3.9)                          | 14.5/10.0 (>6.0)                      | 61/61 (>50.5)                 | 50/55 (>39.3)                   | 47.3/58.5 (>8.8)                      |
| Elbow                                                                        | 7.2/6.8                                 | 13.6/9.4 (>6.0)                       | 68/62 (>51.2)                 | 57/56 (>50.5)                   | 58.5/60.8 (>15.0)                     |
| Axilla                                                                       | 8.4/8.8                                 | 11.6/9.9 (>6.0)                       |                               |                                 |                                       |
| Ulnar Rt./Lt.                                                                |                                         |                                       |                               |                                 |                                       |
| Wrist                                                                        | 2.0/2.2 (<3.0)                          | 9.8/10.7 (>6.0)                       | 61/59 (>51.7)                 | 50/52 (>37.5)                   | 21.9/38.4 (>15.0)                     |
| B elbow                                                                      | 6.3/6.6                                 | 9.8/10.3 (>6.0)                       | 53/50 (>42.5)                 |                                 |                                       |
| A elbow                                                                      | 7.6/7.9                                 | 9.5/10.2 (>6.0)                       | 60/58 (>46.7)                 | 54/51 (>48.5)                   | 26.4/24.2                             |
| Axilla                                                                       | 8.6/9.1                                 | 9.9/8.4 (>6.0)                        |                               | 63/54 (>44.1)                   | 41.1/37.3                             |
| Radial Rt./Lt.                                                               |                                         |                                       |                               |                                 |                                       |
| Wrist                                                                        |                                         |                                       |                               | 50/52 (>38.5)                   | 30.7/33.4                             |
| Forearm                                                                      | 4.1/4.4                                 | 6.9/4.2                               | 100/100                       |                                 |                                       |
| Spiral G                                                                     | 5.3/5.6                                 | 6.7/4.4                               |                               |                                 |                                       |
| On 45th day following the first symptom (45 days from vaccine injection)     |                                         |                                       |                               |                                 |                                       |
| Median Lt.                                                                   |                                         |                                       |                               |                                 |                                       |
| Palm                                                                         |                                         |                                       |                               | 50 (>30)                        | 28.1                                  |
| Wrist                                                                        | 2.9 (<3.9)                              | 12.2 (>6.0)                           | 58 (>50.5)                    | 54 (>39.3)                      | 40.5 (>8.8)                           |
| Elbow                                                                        | 7.2                                     | 12.8 (>6.0)                           | 67 (>51.2)                    | 58 (>50.5)                      | 52.8 (>15.0)                          |
| Axilla                                                                       | 8.9                                     | 11.3 (>6.0)                           |                               |                                 |                                       |
| Ulnar Rt./Lt.                                                                |                                         |                                       |                               |                                 |                                       |
| Wrist                                                                        | 2.6 (<3.0)                              | 10.7 (>6.0)                           | 58 (>51.7)                    | 52 (>37.5)                      | 24.7 (>15.0)                          |
| B elbow                                                                      | 6.9                                     | 9.8 (>6.0)                            | 53 (>42.5)                    |                                 |                                       |
| A elbow                                                                      | 8.3                                     | 9.6 (>6.0)                            | 75 (>46.7)                    | 54 (>48.5)                      | 27.7                                  |
| Axilla                                                                       | 9.1                                     | 9.6 (>6.0)                            |                               | 57 (>44.1)                      | 13.1                                  |
| Radial Rt./Lt.                                                               |                                         |                                       |                               |                                 |                                       |
| Wrist                                                                        |                                         |                                       |                               | 51/50 (>38.5)                   | 23.3/29.9                             |
| Forearm                                                                      | 3.9/2.7                                 | 6.8/6.0                               | 88/50                         |                                 |                                       |
| Spiral G                                                                     | 5.2/4.8                                 | 6.9/6.2                               |                               |                                 |                                       |

A, above; B, below; CMAP, compound muscle action potential; SNAP, sensory nerve action potential; Rt, right; Lt, left.
