# Supplementary material for: Ipsilateral Radial Neuropathy after COVID-19 mRNA Vaccination in an Immunocompetent Young Man
Source: PubMed Central journal article supplement — Yonsei Med J. 2022 Sep 6;63(10):966–70. doi: 10.3349/ymj.2022.0038 (PMC9520044; doi:10.3349/ymj.2022.0038), 2022-09-06
Supplement: ymj-63-966-s002.pdf [file ymj-63-966-s002.pdf]

**Supplementary Table 2.** Electromyography Summary in the Left Upper Limb (on the 17th Day from 2nd Vaccination)

| Summary of muscles | Spontaneous activity |     |     |      | MUAP |     |     | Recruitment pattern |
|--------------------|----------------------|-----|-----|------|------|-----|-----|---------------------|
|                    | IA                   | Fib | PSW | Fasc | Amp  | Dur | PP  |                     |
| Deltoid            | Nml                  | -   | -   | -    | Nml  | Nml | Nml | Nml                 |
| Triceps            | Nml                  | -   | -   | -    | Nml  | Nml | Nml | Nml                 |
| Biceps             | Nml                  | -   | -   | -    | Nml  | Nml | Nml | Nml                 |
| Anconeus           |                      | -   | +1  | -    | Nml  | Nml | Nml |                     |
| EDC                |                      | -   | +1  | -    | Nml  | Nml | Nml |                     |
| EIP                | Nml                  | -   | -   | -    | Nml  | Nml | Nml | Nml                 |
| ECU                | Nml                  | -   | -   | -    | Nml  | Nml | Nml | Nml                 |
| EPL                | Nml                  | -   | -   | -    | Nml  | Nml | Nml | Nml                 |
| BR                 | Nml                  | -   | -   | -    | Nml  | Nml | Nml | Nml                 |
| ECRL               |                      | -   | +1  | -    | Nml  | Nml | Nml |                     |
| FCU                | Nml                  | -   | -   | -    | Nml  | Nml | Nml | Nml                 |
| FPL                | Nml                  | -   | -   | -    | Nml  | Nml | Nml | Nml                 |
| PT                 | Nml                  | -   | -   | -    | Nml  | Nml | Nml | Nml                 |
| FDI                | Nml                  | -   | -   | -    | Nml  | Nml | Nml | Nml                 |
| ADM                | Nml                  | -   | -   | -    | Nml  | Nml | Nml | Nml                 |
| APB                | Nml                  | -   | -   | -    | Nml  | Nml | Nml | Nml                 |
| C6–T1 Para-spinal  | Nml                  | -   | -   | -    |      |     |     |                     |

ADM, abductor digiti minimi; Amp, amplitude; APB, abductor pollicis brevis; BR, brachioradialis; Dur, duration; ECRL, extensor carpi radialis longus; ECU, extensor carpi ulnaris; EDC, extensor digitorum communis; EIP, extensor indicis proprius; EPL, extensor pollicis longus; Fasc, fasciculations; FCU, flexor carpi ulnaris; FDI, first dorsal interosseous; Fib, fibrillation; FPL, flexor pollicis longus; IA, insertional activity; MUAP, motor unit action potential; Nml, normal; PP, polyphasia; PSW, positive sharp wave; PT, pronator teres.
